# Supplementary material
Source: PubMed Central journal article supplement (PMC4170784)
Supplement: NIHMS60287-supplement-01.pdf [file NIHMS60287-supplement-01.pdf]

**Supplementary table 1.** Fully-adjusted hazard ratios and 95% confidence intervals (95% CI) for major cardiovascular outcomes per standard deviation increment in anthropometric variables in participants without prior history of cardiovascular disease at baseline

|                        | <b>Major cardiovascular</b><br>(n = 585) | <b>Major coronary</b><br>(n = 321) | <b>Major cerebrovascular</b><br>(n = 250) | <b>Cardiovascular death</b><br>(n = 256) |
|------------------------|------------------------------------------|------------------------------------|-------------------------------------------|------------------------------------------|
| BMI, kg/m <sup>2</sup> | 0.97 (0.88 to 1.07)                      | 1.02 (0.90 to 1.16)                | 0.82 (0.70 to 0.97)                       | 1.02 (0.88 to 1.18)                      |
| WC, cm                 | 0.99 (0.89 to 1.09)                      | 0.99 (0.87 to 1.14)                | 0.95 (0.82 to 1.11)                       | 0.95 (0.81 to 1.10)                      |
| WHR                    | 1.01 (0.92 to 1.11)                      | 1.04 (0.92 to 1.19)                | 1.01 (0.88 to 1.17)                       | 1.00 (0.87 to 1.15)                      |

BMI, body mass index; WC, waist circumference; WHR, waist to hip ratio

Models are adjusted for age, sex, current smoking, ethnicity, treatment allocation, systolic blood pressure, total cholesterol, HDL cholesterol, HbA1c and statin use, aspirin use, other antiplatelets and blood pressure lowering medications classes (beta blockers, calcium channel blocker, ACE inhibitors, ARA II, diuretics, others).
